# Supplementary material
Source: PubMed Central journal article supplement (PMC4024841)
Supplement: Supp_Fig1.pdf [file Supp_Fig1.pdf]

## Supplementary Data

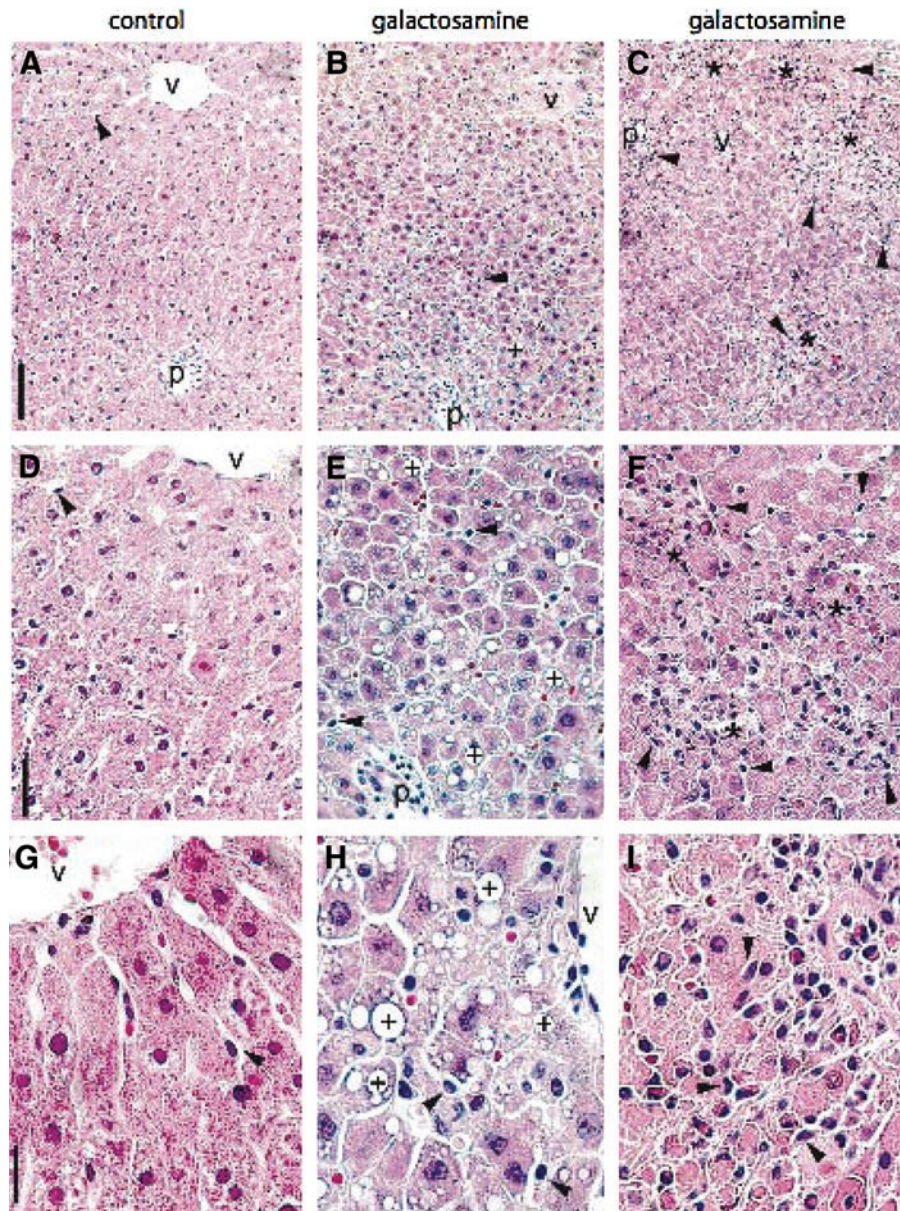

**SUPPLEMENTARY FIG. S1. Histological evaluation of the livers of control and D-galactosamine-treated rats.** Paraffin-embedded sections of livers from control (A, D, G) and galactosamine-treated animals (B, C, E, F, H, I) were prepared for hematoxylin/eosin staining. The figure shows representative *panels* for individuals in each group, proving the presence of acute liver injury in the treated animals. Focal necrosis (\*), Kupffer cell hyperplasia, and inflammatory cell infiltration (*arrowheads*) were visible. In one case, fat infiltration (+) in the periportal area was also observed (B, E, H). Locations of portal vessels (p) and central vein (v) are also indicated. The scale bar corresponds to 50  $\mu\text{m}$  (A–C), 20  $\mu\text{m}$  (D–F), and 10  $\mu\text{m}$  (G–I).
