# Supplementary material
Source: PubMed Central journal article supplement (PMC4024841)
Supplement: Supp_Fig2.pdf [file Supp_Fig2.pdf]

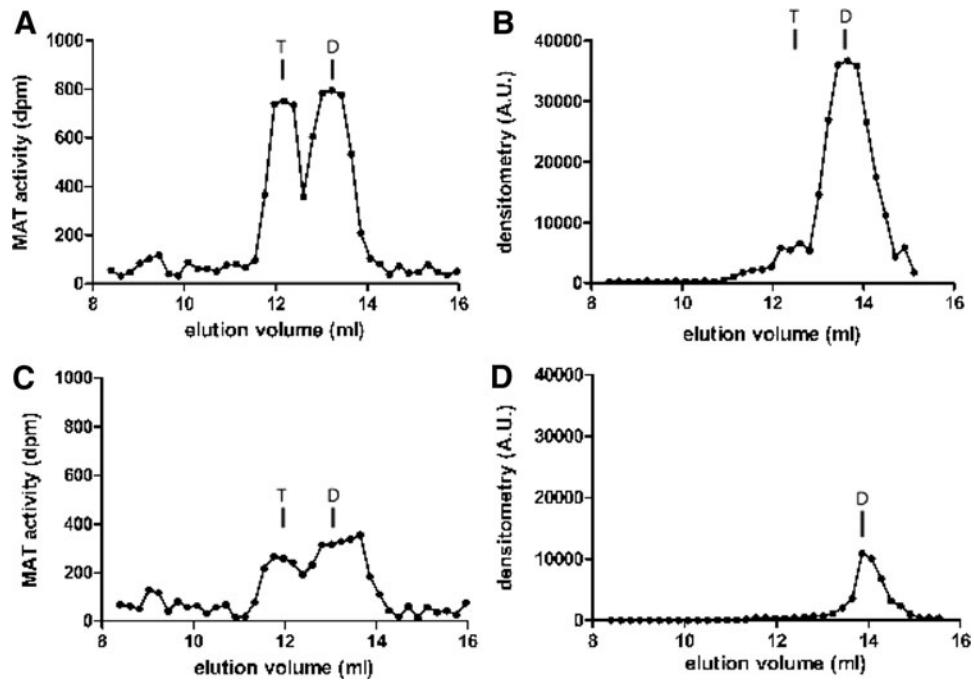

**SUPPLEMENTARY FIG. S2. Gel filtration chromatography profiles of cytosolic MAT I/III.** Cytosolic samples (1 mg) of control (A, B) and D-galactosamine-treated rat livers (C, D) were loaded on a Superose 12/10 HR column and the eluting fractions were collected. Samples of these fractions were used to measure total MAT activity at 5 mM methionine (A, C), and for dot-blot analysis of MAT $\alpha$ 1 protein (B, D). The figure shows profiles of representative samples of each group. The markers eluted were as follows: blue dextran (7.66 ml), apoferritin (9.87 ml),  $\beta$ -amylase (11.97 ml), alcohol dehydrogenase (12.81 ml), carbonic anhydrase (15.12 ml), and ATP (19.26 ml). The elution volumes for tetramers (T) and dimers (D) are indicated. MAT, methionine adenosyltransferase.
