# Supplementary material
Source: PubMed Central journal article supplement (PMC4024841)
Supplement: Supp_Fig3-5.pdf [file Supp_Fig3-5.pdf]

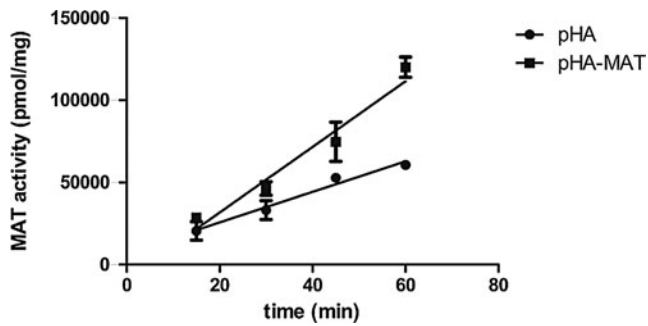

**SUPPLEMENTARY FIG. S3. HA-MAT $\alpha$ 1 activity as a function of time. HA-MAT $\alpha$ 1 was overexpressed in *Escherichia coli* BL21(DE3) cells and the soluble fraction was isolated. MAT activity was measured using a reaction mixture containing 5 mM methionine and 5 mM ATP. The reaction was carried out in triplicate at 37°C and the production of AdoMet was analyzed at 15, 30, 45, and 60 min. The same analysis was carried out in parallel using pHA transformed cells, in order to determine the background provided by the *E. coli* MAT isoenzyme. The figure shows results (mean  $\pm$  SD) of a representative experiment carried out in triplicate. Calculated specific activities were determined for pHA [928.2  $\pm$  79.15 pmol/(min  $\cdot$  mg<sup>-1</sup>)] and pHA-MAT [1995.0  $\pm$  220.7 pmol/(min  $\cdot$  mg<sup>-1</sup>)] transformed cells. AdoMet, S-adenosylmethionine.**

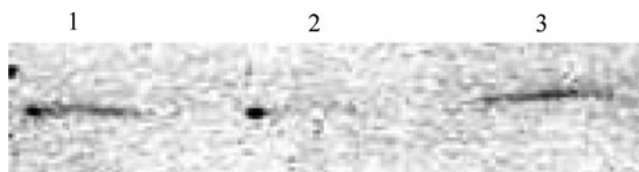

**SUPPLEMENTARY FIG. S4. HA-MAT $\alpha$ 1 levels in the soluble fraction of BL21(DE3) cells.** The figure shows a representative western blot of samples from the soluble fraction (lane 1), a 1:10 (v/v) dilution of this fraction (lane 2), and a concentrated sample of the HA-MAT $\alpha$ 1 peak eluted from AGFC (lane 3) using anti-HA. HA-MAT $\alpha$ 1 exhibits a calculated molecular mass of 53.8 kDa according to the mobility of the standards. The low expression observed in the soluble fraction can explain the low level of activity detected. AGFC, analytical gel filtration chromatography.

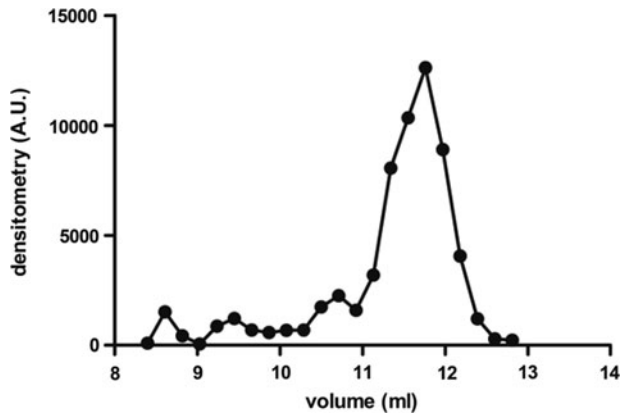

**SUPPLEMENTARY FIG. S5. AGFC elution profile of HA-MAT $\alpha$ 1.** A sample of the soluble fraction (100  $\mu$ l) obtained from *E. coli* BL21 (DE3) transfected with pHA-MAT was injected onto a Superose 12 10/300 GL gel filtration chromatography column and run at 0.3 ml/min. Fractions (210  $\mu$ l) were collected and aliquots (100  $\mu$ l) were used for dot-blot detection of HA-MAT $\alpha$ 1 using anti-HA. The intensity of the spots was established by densitometric scanning using ImageJ software and represented against the elution volume. The figure shows a representative elution profile of three experiments carried out in triplicate. The elution volume of the markers was as follows: blue dextran (7.13 ml), apoferritin (9.55 ml),  $\beta$ -amylase (10.38 ml), alcohol dehydrogenase (11.05 ml), carbonic anhydrase (13 ml), and ATP (17.39 ml). The elution volume of the main peak detected corresponds to that expected for a protein of  $\sim$ 85 kDa, in agreement with that estimated for a dimer of HA-MAT $\alpha$ 1 subunits.
