# Supplementary material
Source: PubMed Central journal article supplement (PMC4024841)
Supplement: Supp_Fig6.pdf [file Supp_Fig6.pdf]

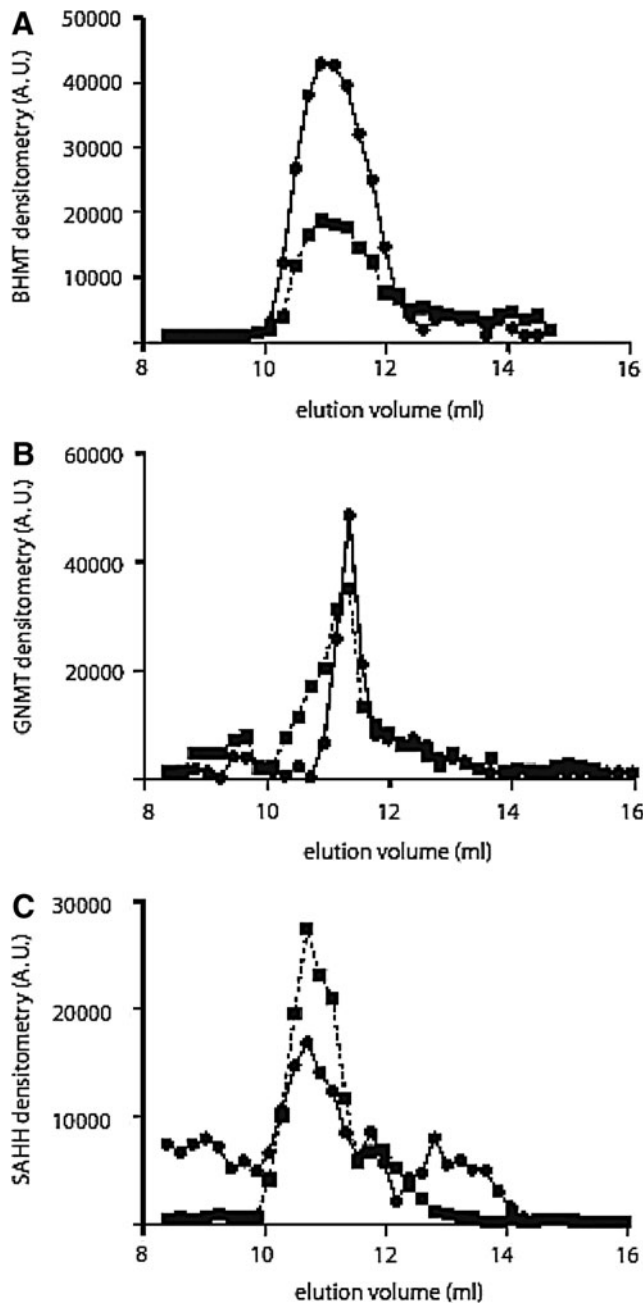

**SUPPLEMENTARY FIG. S6. AGFC profiles of cytosolic BHMT, GNMT, and SAHH.** Liver cytosols (100  $\mu$ l) from control ( $\lambda$ ) and galactosamine-treated ( $v$ ) animals were injected onto a Superose 12 10/300 GL gel filtration chromatography column and run at 0.3 ml/min. Fractions (210  $\mu$ l) were collected and aliquots (50  $\mu$ l) were used for dot-blot detection of BHMT (**A**), GNMT (**B**), or SAHH (**C**) using the corresponding antibodies. The intensity of the spots was established by densitometric scanning using ImageJ software and represented against the elution volume. The figure shows a representative elution profile of six independent experiments carried out in duplicate. The elution volume of the markers was as follows: blue dextran (7.13 ml), apoferritin (9.55 ml),  $\beta$ -amylase (10.38 ml), alcohol dehydrogenase (11.05 ml), carbonic anhydrase (13 ml), and ATP (17.39 ml). BHMT, betaine homocysteine methyltransferase; GNMT, glycine *N*-methyltransferase; SAHH, *S*-adenosylhomocysteine hydrolase.
