# Supplementary material
Source: PubMed Central journal article supplement (PMC4024841)
Supplement: Supp_Fig7.pdf [file Supp_Fig7.pdf]

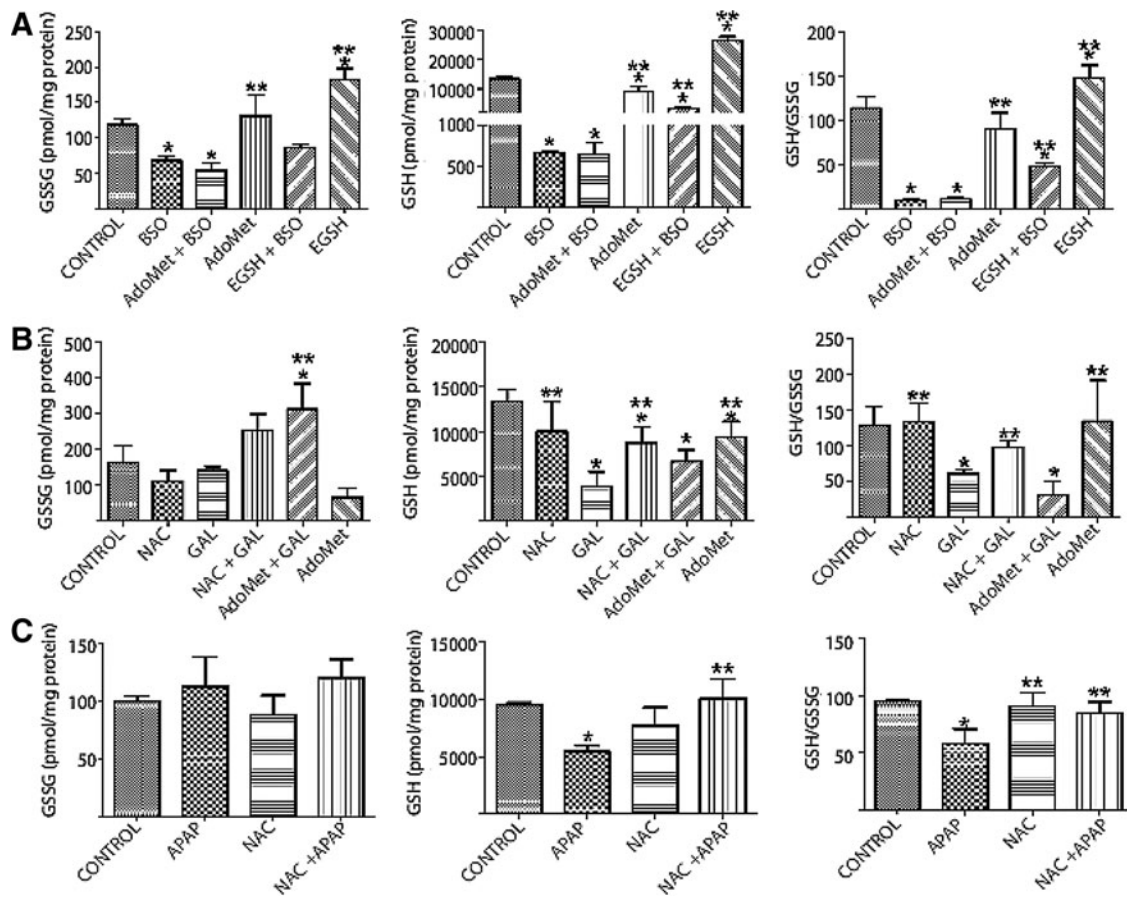

**SUPPLEMENTARY FIG. S7. Glutathione levels in transfected H35 cells subjected to different treatments.** GSH and GSSG levels were determined in transfected H35 cells after the addition of 1 mM BSO (**A**), 10 mM galactosamine (Gal; **B**), or 5 mM APAP (**C**) alone or in combination with 5 mM NAC, 1 mM EGSH, or 0.5 mM AdoMet. Appropriate controls including the vehicle (PBS or 1% ethanol) were included for comparison. *Left panels* show calculated GSSG levels, *central panels* depict the GSH content, and *right panels* represent the calculated GSH/GSSG ratio. The results shown are the mean  $\pm$  SD of four independent experiments carried out in triplicate. NAC, *N*-acetylcysteine; EGSH, glutathione ethyl ester; APAP, acetaminophen; BSO, buthionine sulfoximine; GSH, glutathione reduced form; GSSG, glutathione oxidized form; PBS, phosphate-buffered saline.
