# Supplementary material
Source: PubMed Central journal article supplement (PMC4024841)
Supplement: Supp_Fig8.pdf [file Supp_Fig8.pdf]

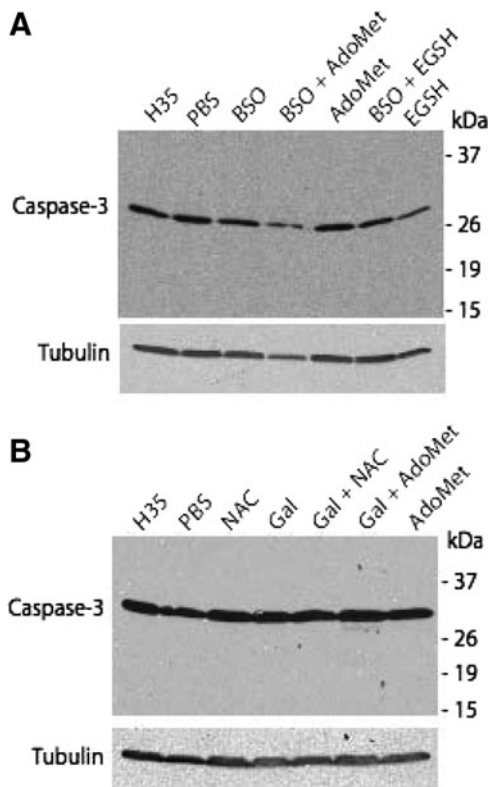

**SUPPLEMENTARY FIG. S8. Effects of BSO and D-galactosamine treatments on caspase-3 activation in pHA-MAT-transfected cells.** Hepatoma H35 cells transiently transfected with pHA-MAT were treated with BSO for 24 h alone or in combination with AdoMet or EGSH (**A**). Transfected cells were also treated for 48 h with galactosamine (Gal) alone or in combination with AdoMet or NAC (**B**). Cellular extracts were obtained and samples (50  $\mu$ g) were analyzed by western blot using anti-caspase-3 and anti-tubulin antibodies. Representative western blots of nine independent experiments are shown in the figure. The mobility and size of the standards are indicated on the *right*.
