# Supplementary material
Source: PubMed Central journal article supplement (PMC4024841)
Supplement: Supp_Fig9.pdf [file Supp_Fig9.pdf]

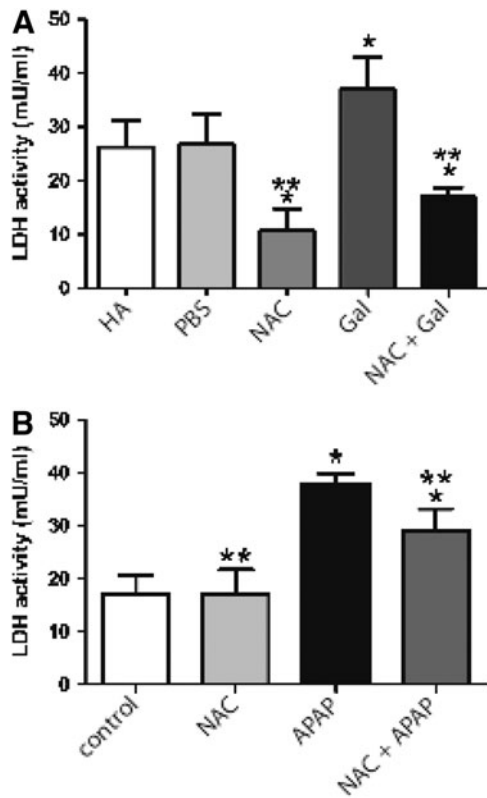

**SUPPLEMENTARY FIG. S9. LDH activity measured in the culture media of H35 cells transfected with pHA-MAT.** H35 transfected cells were treated with 10 mM galactosamine (Gal; 48 h), 5 mM APAP (24 h), 5 mM NAC, or their combinations. LDH activity was measured in the cell media (100  $\mu$ l). The figure shows results (mean  $\pm$  SD) of six independent experiments carried out in triplicate for galactosamine (A) and APAP treatments (B). Multiple comparisons of the data were carried out with ANOVA using GraphPad Prism and considered significant when  $p \leq 0.05$  versus PBS (\*), Gal or APAP (\*\*).
