# Supplementary material
Source: PubMed Central journal article supplement (PMC4024841)
Supplement: Supp_Fig10.pdf [file Supp_Fig10.pdf]

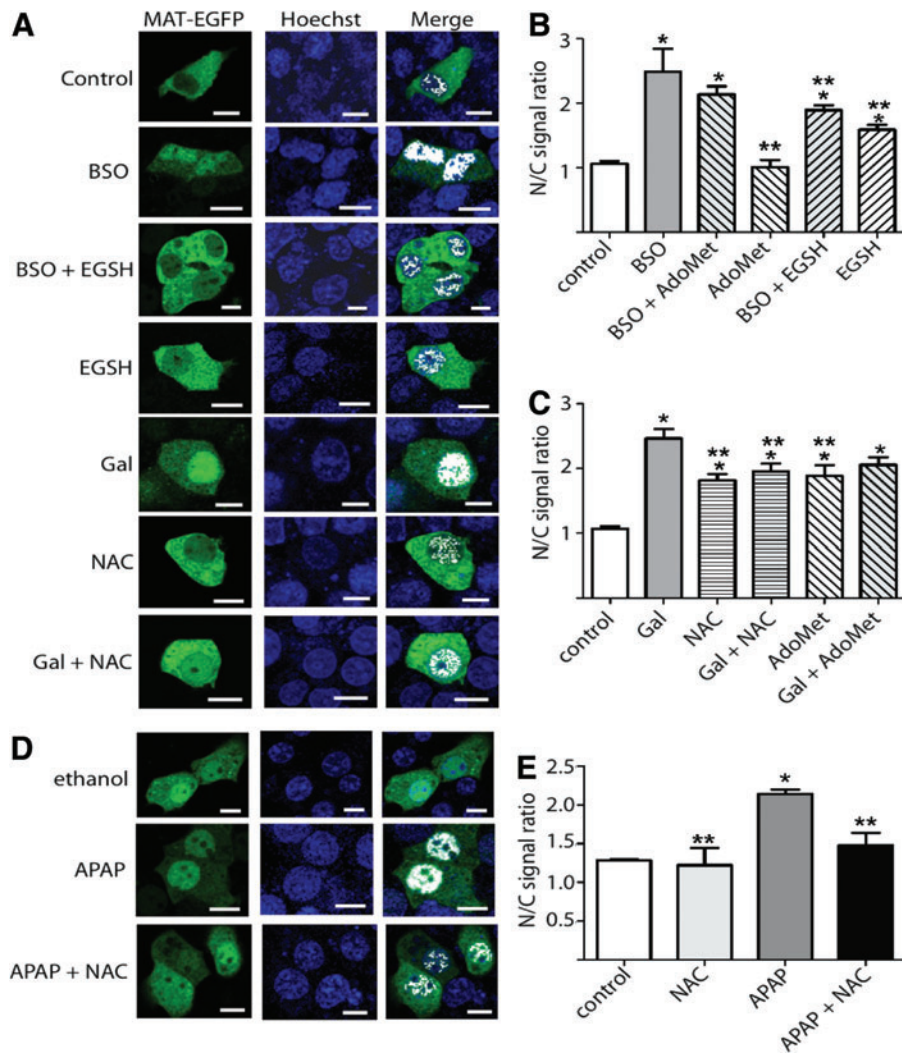

**SUPPLEMENTARY FIG. S10. Effects of redox-modulating agents on nucleocytoplasmic distribution of MAT $\alpha$ 1-EGFP analyzed by *in vivo* confocal microscopy.** Hepatoma H35 cells were transiently transfected with pMAT-EGFP and the effect of several additives was analyzed *in vivo* by confocal microscopy. *Panels (A)* and *(D)* show representative confocal images of several treatments, including colocalization with nuclear staining (scale bar = 10  $\mu$ m). Nuclear (N) and cytoplasmic (C) EGFP signals were quantified using the Leica Confocal Software and the N/C ratio was calculated for a minimum of 100 cells per treatment. *Panel (B)* depicts quantification of results obtained in experiments with BSO (24 h), *panel (C)* shows data of D-galactosamine (48 h) treatments, and *panel (E)* illustrates quantifications obtained in experiments including APAP (24 h). For graphical purposes, *panels (B), (C), and (E)* depict the mean  $\pm$  SEM of the data analyzed using ANOVA with Bonferroni *post hoc* testing. Significant changes ( $p \leq 0.05$ ) versus control with PBS or ethanol (\*), and BSO, galactosamine, or APAP (\*\*) are indicated. EGFP, enhanced green fluorescence protein; N/C, nuclear-to-cytoplasmic signal ratio.
