# Supplementary material
Source: PubMed Central journal article supplement (PMC4024841)
Supplement: Supp_Fig11.pdf [file Supp_Fig11.pdf]

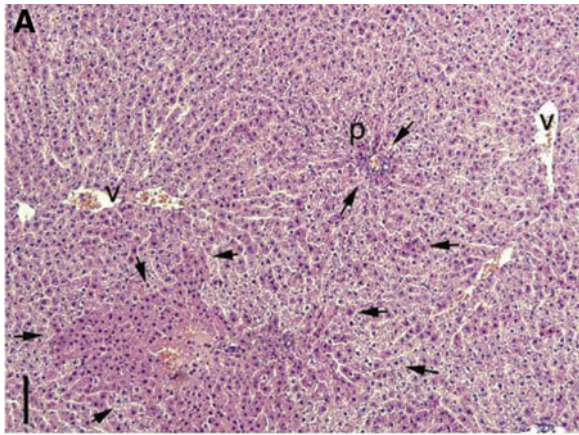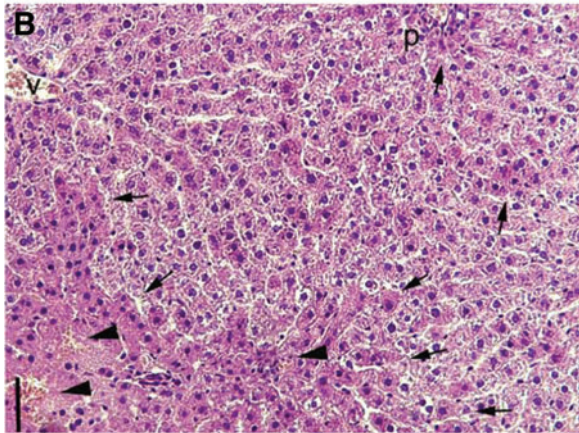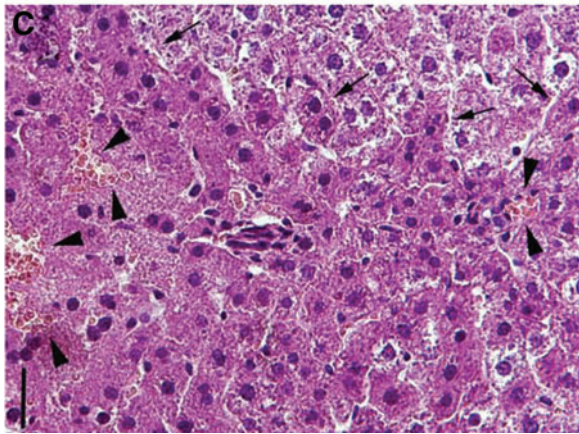

**SUPPLEMENTARY FIG. S11. Histological evaluation of liver sections of rats treated with APAP.** Paraffin-embedded sections of livers from APAP-treated animals were prepared for hematoxylin/eosin staining. The figure shows representative photomicrographs that prove the presence of a large number of necrotic hepatocytes (*arrows*). The presence of sinusoidal congestion with red blood cells (*arrowheads*) was visible as compared with the normal architecture of control liver sections (Supplementary Fig. S1A, D, and G). The scale bar corresponds to 100  $\mu\text{m}$  (**A**), 50  $\mu\text{m}$  (**B**), and 10  $\mu\text{m}$  (**C**).
