# Supplementary material
Source: PubMed Central journal article supplement (PMC4024841)
Supplement: Supp_Fig12.pdf [file Supp_Fig12.pdf]

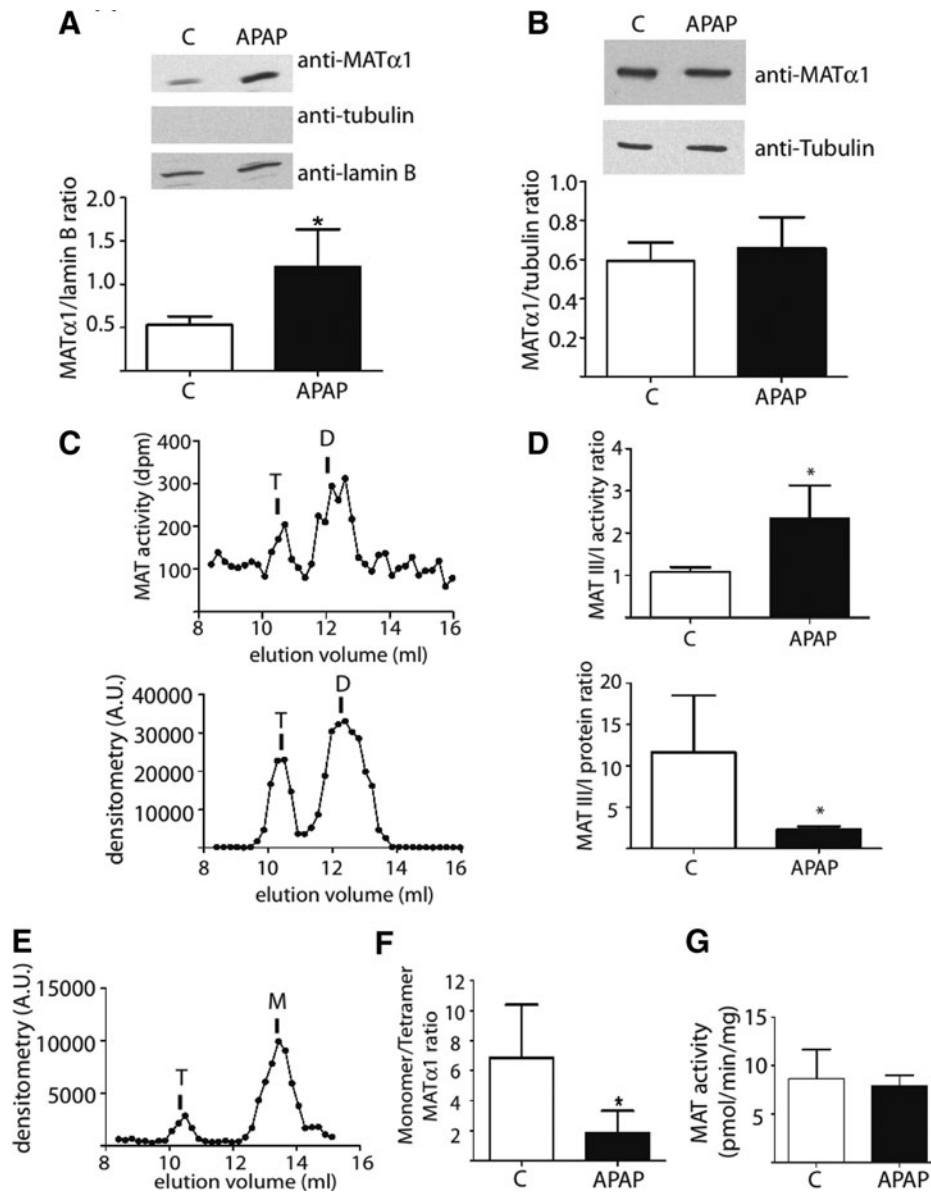

**SUPPLEMENTARY FIG. S12. Effects of APAP treatment on MAT $\alpha$ 1 subcellular distribution and oligomerization in rat liver.** Cytosolic and nuclear fractions were isolated from livers of control and APAP-treated rats. Panel (A) shows MAT $\alpha$ 1 levels in nuclear fractions using lamin B as the reference, whereas panel (B) illustrates MAT $\alpha$ 1 levels in the cytosol using  $\alpha$ -tubulin as the loading control. Representative MAT activity and dot-blot profiles ( $n=6$ ) of cytosolic samples analyzed on a Superose 12 10/300GL gel filtration chromatography column run at 0.3 ml/min are depicted in panel (C), whereas a representative dot-blot profile of a nuclear sample appears in panel (E). The elution volume of the markers was as follows: blue dextran (7.13 ml), apoferritin (9.55 ml),  $\beta$ -amylase (10.38 ml), alcohol dehydrogenase (11.05 ml), carbonic anhydrase (13 ml), and ATP (17.39 ml). Quantification of the cytosolic dimer/tetramer activity and protein ratios are shown in panel (D), whereas the nuclear monomer/tetramer ratio appears in panel (F). Panel (G) illustrates nuclear MAT activity in control and APAP-treated livers. The results shown are the mean  $\pm$  SD of six independent samples;  $p \leq 0.05$  (\*).
