# Supplementary material
Source: PubMed Central journal article supplement (PMC4024841)
Supplement: Supp_Fig13.pdf [file Supp_Fig13.pdf]

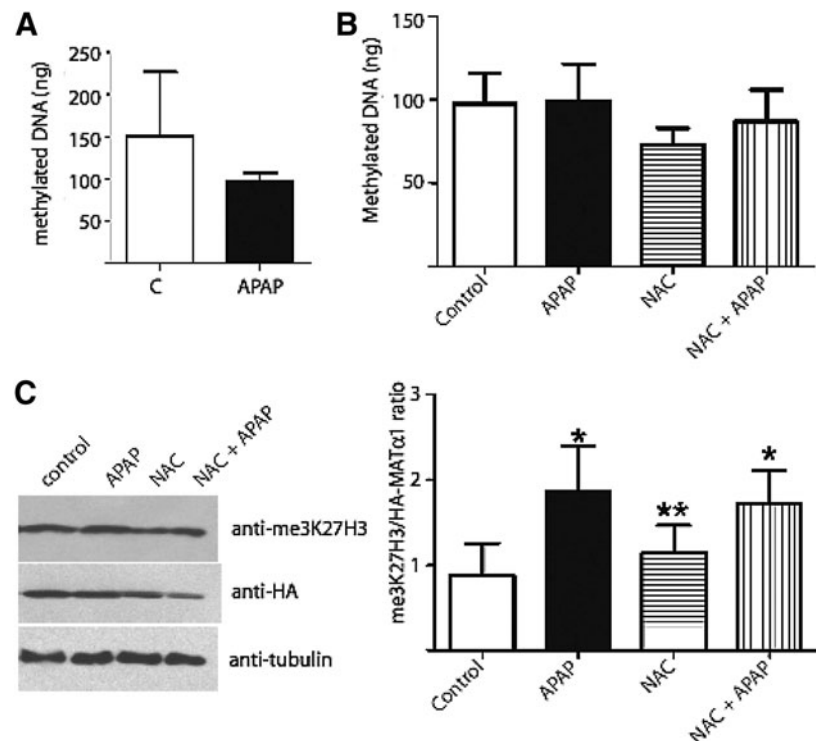

**SUPPLEMENTARY FIG. S13. Effects of APAP on DNA and histone methylations.** The figure shows the effects of APAP treatment on global DNA methylation in DNA samples of control and APAP-treated livers (A). In addition, the effects of APAP alone or in combination with NAC were also evaluated in H35 transfected cells. Panel (B) depicts the changes in global DNA methylation induced by the treatments in pHA-MAT-transfected cells, whereas panel (C) illustrates the alterations observed in K27 trimethylation of histone 3. The histograms show the mean  $\pm$  SD of three independent experiments carried out in triplicate. Multiple comparisons were carried out with ANOVA;  $p \leq 0.05$  versus control (\*) or APAP (\*\*).
