# Supplementary material
Source: PubMed Central journal article supplement (PMC4024841)
Supplement: Supp_Fig14.pdf [file Supp_Fig14.pdf]

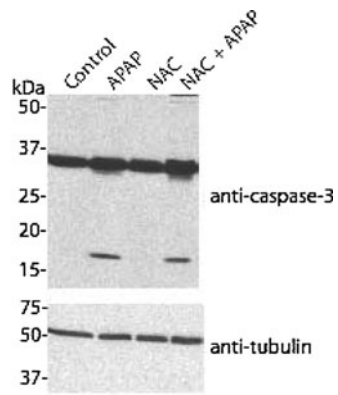

**SUPPLEMENTARY FIG. S14. Effects of APAP treatment on caspase-3 activation in pHA-MAT-transfected cells.** Hepatoma H35 cells transiently transfected with pHA-MAT were treated with APAP for 24 h alone or in combination with NAC. Cellular extracts were obtained and samples (50  $\mu$ g) were analyzed by western blot using anti-caspase-3 and anti-tubulin antibodies. Representative western blots of five independent experiments are shown in the figure. The mobility and size of the standards are indicated on the *left*.
