# Supplementary material
Source: PubMed Central journal article supplement (PMC4024841)
Supplement: Supp_Fig15.pdf [file Supp_Fig15.pdf]

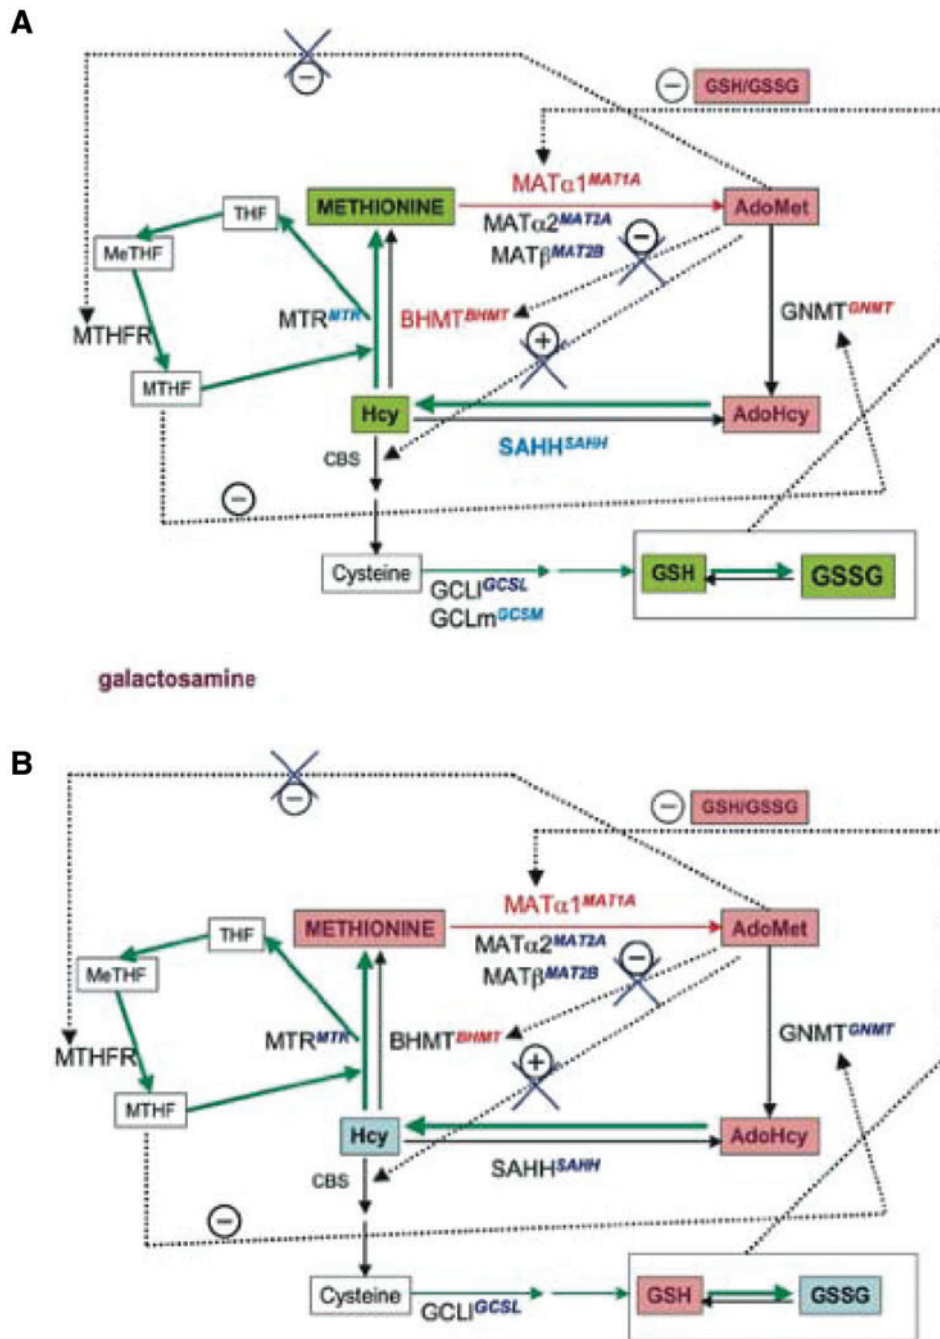

**SUPPLEMENTARY FIG. S15. Schematic representation of the cytoplasmic changes in the methionine cycle and connecting pathways detected in the animal models used. (A) Changes in the galactosamine model and (B) alterations detected in the APAP model. Metabolites measured in this study appear in boxes colored according to the changes observed: decreased (red), increased (green), and nonmodified levels (light blue). Metabolites that were not determined appear in white boxes. Changes in mRNA levels are indicated as superscripts to the protein symbol; those included in panel (B) were reported by Schnackenberg *et al.* (56). Again, a color code has been used to indicate the alterations observed: decrease (red), increase (light blue), and sharp increase (dark blue); black characters indicate no change or undetected protein. Colored arrows indicate the favored (green), decreased (red), or unchanged (black) reactions according to our results (galactosamine) and/or Schnackenberg *et al.* (APAP). Nuclear changes in protein levels have been excluded for clarity.**
