# Supplementary material
Source: PubMed Central journal article supplement (PMC4024841)
Supplement: Supp_Table1.pdf [file Supp_Table1.pdf]

SUPPLEMENTARY TABLE S1. ACTIVITY MEASUREMENTS

|                                     | <i>Assay conditions</i>     | <i>Control (n=15)</i> | <i>Galactosamine (n=16)</i> | <i>p-Value</i>    |
|-------------------------------------|-----------------------------|-----------------------|-----------------------------|-------------------|
| ALT (U/L)                           | Serum                       | 28.33±3.41            | 1212±454.2 <sup>a</sup>     | < 0.001           |
| AST (U/L)                           | Serum                       | 131.5±22.32           | 2466.0±749.8 <sup>a</sup>   | < 0.001           |
| MAT [pmol/(min·mg <sup>-1</sup> )]  | 60 μM Met                   | 50.33±3.43            | 54.03±3.17                  | 0.51              |
|                                     | 60 μM Met + 10% DMSO        | 503.34±34.27          | 622.31±51.49                | 0.17              |
|                                     | 5 mM Met                    | 689.0±132.2           | 336.1±43.57 <sup>a</sup>    | 0.04              |
| BHMT [nmol/(min·mg <sup>-1</sup> )] | 6.5 mM Betaine + 6.5 mM Hcy | 0.268±0.05            | 0.197±0.07 <sup>a</sup>     | 0.02              |
| MAT III/I ratio                     | 5 mM Met                    | 1.08±0.11             | 1.45±0.56                   | 0.29 <sup>b</sup> |

ALT and AST activities were measured in serum, whereas MAT and BHMT activities were determined in liver cytosol from control and D-galactosamine-treated animals that received two 400 mg/kg i.p. doses of the agent as described under the "Materials and Methods" section. The assay conditions correspond to total MAT activity (5 mM methionine), MAT I and MAT II activities (60 μM methionine), and MAT I, MAT II, and stimulated MAT III activities (60 μM methionine + 10% v/v DMSO). Activity in MATα1 tetramer (MAT I) and dimer (MAT III) peaks obtained by AGFC was measured at saturating concentrations of the substrates to calculate the MAT I/III activity ratio for animals in each group. The data shown are the mean ± SD of measurements made in triplicate for every individual in each group.

<sup>a</sup>Significant,  $p \leq 0.05$ .

<sup>b</sup>Variances significantly different according to Bartlett's test.

ALT, alanine aminotransferase; AST, aspartate aminotransferase; AGFC, analytical gel filtration chromatography; BHMT, betaine homocysteine methyltransferase; Hcy, homocysteine; MAT, methionine adenosyltransferase.
