# Supplementary material
Source: PubMed Central journal article supplement (PMC4024841)
Supplement: Supp_Table2.pdf [file Supp_Table2.pdf]

SUPPLEMENTARY TABLE S2. HEPATIC METABOLITE LEVELS DETERMINED BY UPLC-MS  
IN LIVER SAMPLES OF THE GALACTOSAMINE MODEL

|                        | <i>Control (n=12)<sup>a</sup></i> | <i>Galactosamine (n=10)<sup>a</sup></i> | <i>p-Value</i> |
|------------------------|-----------------------------------|-----------------------------------------|----------------|
| AdoMet (nmol/g)        | 71.38±14.32                       | 47.98±9.21 <sup>b</sup>                 | 0.03           |
| AdoHcy (nmol/g)        | 51.54±10.84                       | 44.88±9.34                              | 0.37           |
| AdoMet/AdoHcy          | 1.50±0.19                         | 1.07±0.17 <sup>b</sup>                  | 0.03           |
| Hcy (nmol/g)           | 5.34±0.51                         | 6.72±0.97 <sup>b</sup>                  | 0.01           |
| Methionine (nmol/g)    | 180.4±42.64                       | 265.3±62.24 <sup>b</sup>                | 0.03           |
| GSH (nmol/mg protein)  | 85.67±26.5                        | 122.0±29.88                             | 0.09           |
| GSSG (nmol/mg protein) | 2.07±0.81                         | 3.99±1.67 <sup>b</sup>                  | 0.04           |
| GSH/GSSG               | 43.60±6.13                        | 29.88±10.68 <sup>b</sup>                | 0.03           |

<sup>a</sup>The results are the amount quantified per gram of tissue for each group (mean±SD).

<sup>b</sup>Significant,  $p \leq 0.05$ .

AdoHcy, S-adenosylhomocysteine; AdoMet, S-adenosylmethionine; GSH, glutathione reduced form; GSSG, glutathione oxidized form; UPLC-MS, ultraperformance liquid chromatography–mass spectrometry.
