# Supplementary material
Source: PubMed Central journal article supplement (PMC4024841)
Supplement: Supp_Table3.pdf [file Supp_Table3.pdf]

SUPPLEMENTARY TABLE S3. EFFECT OF D-GALACTOSAMINE TREATMENT ON mRNA AND PROTEIN HALF-LIVES IN H35 CELLS

|                                    | Control       | Galactosamine <sup>a</sup> | p-Value |
|------------------------------------|---------------|----------------------------|---------|
| mRNA half-life (h) <sup>b</sup>    |               |                            |         |
| MAT2A                              | 5.83 ± 2.44   | 6.25 ± 1.78                | 0.79    |
| MAT2B                              | 6.76 ± 1.90   | 12.53 ± 2.44 <sup>c</sup>  | 0.02    |
| SAHH                               | 67.36 ± 29.88 | 9.77 ± 0.70 <sup>c</sup>   | 0.02    |
| MTR                                | 12.48 ± 4.16  | 13.49 ± 10.22              | 0.86    |
| BHMT                               | 82.53 ± 77.0  | 9.58 ± 10.14               | 0.24    |
| GCLI                               | 4.00 ± 0.56   | 7.70 ± 2.06 <sup>c</sup>   | 0.02    |
| GCLm                               | 11.23 ± 4.82  | 39.80 ± 1.88 <sup>c</sup>  | 0.003   |
| Protein half-life (h) <sup>d</sup> |               |                            |         |
| BHMT                               | 16.34 ± 6.25  | 44.20 ± 20.47 <sup>c</sup> | 0.05    |
| SAHH                               | 14.62 ± 3.22  | 34.85 ± 15.27 <sup>c</sup> | 0.01    |

H35 cells were treated with PBS or 10 mM D-galactosamine (<sup>a</sup>) for 48 h before addition of 5 µg/ml actinomycin D (<sup>b</sup>) or 20 µg/ml cycloheximide (<sup>d</sup>) in the absence of serum to determine mRNA or protein half-lives, respectively. The results shown are the average of three experiments carried out in triplicate (mean ± SD) and were considered significant when  $p \leq 0.05$  (<sup>c</sup>).

GCLm,  $\gamma$ -glutamylcysteine synthetase modifier; GCLI,  $\gamma$ -glutamylcysteine synthetase ligase; MTR, methionine synthase; SAHH, S-adenosylhomocysteine hydrolase.
