# Supplementary material
Source: PubMed Central journal article supplement (PMC4024841)
Supplement: Supp_Table4.pdf [file Supp_Table4.pdf]

SUPPLEMENTARY TABLE S4. ACTIVITIES AND METABOLITE LEVELS IN RATS TREATED WITH APAP

|                                    | <i>Assay conditions</i> | <i>Control (n=6)</i> | <i>APAP (n=6)</i>         | <i>p-Value</i> |
|------------------------------------|-------------------------|----------------------|---------------------------|----------------|
| ALT (U/L)                          | Serum                   | 28.33±3.41           | 1324±453 <sup>a</sup>     | <0.0001        |
| AST (U/L)                          | Serum                   | 131.5±22.32          | 2630±1075.8 <sup>a</sup>  | <0.0001        |
| AdoMet (nmol/g)                    | Liver                   | 77.43±8.20           | 59.43±5.05 <sup>a</sup>   | 0.049          |
| AdoHcy (nmol/g)                    | Liver                   | 48.79±5.33           | 30.82±3.49 <sup>a</sup>   | 0.045          |
| AdoMet/AdoHcy                      | Liver                   | 1.42±0.08            | 2.33±0.27 <sup>a</sup>    | 0.001          |
| Hcy (nmol/g) <sup>b</sup>          | Liver                   | <1.5                 | <1.5                      | –              |
| Methionine (nmol/g)                | Liver                   | 186.6±38.90          | 94.88±18.54 <sup>a</sup>  | 0.012          |
| GSH (nmol/mg protein)              | Liver                   | 77.31±20.48          | 41.45±10.37 <sup>a</sup>  | 0.04           |
| GSSG (nmol/mg protein)             | Liver                   | 1.58±0.04            | 1.15±0.05 <sup>a</sup>    | 0.001          |
| GSH/GSSG                           | Liver                   | 47.87±3.06           | 36.34±6.28 <sup>a</sup>   | 0.049          |
| MAT [pmol/(min·mg <sup>-1</sup> )] | 60 μM Met               | 161.5±4.39           | 128.0±4.91 <sup>a</sup>   | 0.001          |
|                                    | 60 μM Met + 10% DMSO    | 654.8±25.21          | 611.4±14.93               | 0.195          |
|                                    | 5 mM Met                | 2389.0±131.1         | 1957.0±121.7 <sup>a</sup> | 0.027          |
| MAT III/I activity ratio           | 5 mM Met                | 1.08±0.11            | 2.35±0.70 <sup>a</sup>    | 0.016          |

ALT and aspartate aminotransferase activities were measured in serum samples of control and APAP-treated animals. On the other hand, metabolite levels and cytosolic MAT activity were determined in liver samples as described under the “Materials and Methods” section. The activity data shown are the mean±SD of measurements made in triplicate for every individual in each group.

<sup>a</sup>Significant,  $p \leq 0.05$ .

<sup>b</sup>Below the quantification limit.

APAP, acetaminophen.
